# Supplementary material
Source: MDPI journal article supplement (https://www.mdpi.com/2072-4292/14/4/1050)
Supplement: s1 [file s1]

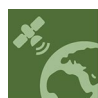**Table S1.** List of IGS stations used in this paper with their latitude, longitude, and altitude.

| name | city                   | country              | lat (°) | lon (°) | alt (m) |
|------|------------------------|----------------------|---------|---------|---------|
| ALBH | Victoria               | Canada               | 48.39   | -123.49 | 50.18   |
| ALGO | Algonquin Park         | Canada               | 45.96   | -78.07  | 236.98  |
| ALIC | Alice Springs          | Australia            | -23.67  | 133.89  | 588.12  |
| ANKR | Ankara                 | Turkey               | 39.89   | 32.76   | 938.82  |
| AREQ | Arequipa               | Peru                 | -16.47  | -71.49  | 2449.07 |
| AUCK | Whangaparaoa Peninsula | New Zealand          | -36.60  | 174.83  | 97.79   |
| AZU1 | Azusa                  | United States        | 34.13   | -117.90 | 178.44  |
| BLYT | Blythe                 | United States        | 33.61   | -114.72 | 118.99  |
| BOGT | Bogota                 | Colombia             | 4.64    | -74.08  | 2553.82 |
| BOR1 | Borowiec               | Poland               | 52.28   | 17.07   | 88.84   |
| BRAN | Burbank                | United States        | 34.19   | -118.28 | 280.41  |
| BRAZ | Brasilia               | Brazil               | -15.95  | -47.88  | 1118.61 |
| BRMU | Bermuda                | United Kingdom       | 32.37   | -64.70  | 20.83   |
| BRUS | Brussels               | Belgium              | 50.80   | 4.36    | 104.22  |
| CAGL | Cagliari               | Italy                | 39.14   | 8.97    | 192.10  |
| CAS1 | Casey                  | Antarctica           | -66.28  | 110.52  | 39.41   |
| CCJM | Ogasawara              | Japan                | 27.10   | 142.19  | 159.85  |
| CEDU | Ceduna                 | Australia            | -31.87  | 133.81  | 153.79  |
| CFAG | Caucete                | Argentina            | -31.60  | -68.23  | 678.26  |
| CHAT | Chatham Islands        | New Zealand          | -43.96  | -176.57 | 47.78   |
| CHIL | San Gabriel Mountains  | United States        | 34.33   | -118.03 | 1599.88 |
| CHUR | Churchill              | Canada               | 58.76   | -94.09  | 28.80   |
| CIT1 | Pasadena               | United States        | 34.14   | -118.13 | 249.45  |
| CMP9 | Sylmar                 | United States        | 34.35   | -118.41 | 1171.52 |
| COCO | Cocos (Keeling) Island | Australia            | -12.19  | 96.83   | 3.29    |
| COSO | Coso Junction          | United States        | 35.98   | -117.81 | 1484.55 |
| CRFP | Yucaipa                | United States        | 34.04   | -117.10 | 721.13  |
| CRO1 | Christiansted          | Virgin Islands, U.S. | 17.76   | -64.58  | 11.73   |
| CSN1 | Northridge             | United States        | 34.25   | -118.52 | 296.13  |
| DARW | Darwin                 | Australia            | -12.84  | 131.13  | 74.66   |
| DAV1 | Davis                  | Antarctica           | -68.58  | 77.97   | 27.14   |
| DGAR | Diego Garcia Island    | United Kingdom       | -7.27   | 72.37   | 8.95    |
| DHLG | Durmid Hill            | United States        | 33.39   | -115.79 | -49.01  |
| DRAO | Penticton              | Canada               | 49.32   | -119.63 | 558.42  |
| DUBO | Lac Du Bonnet          | Canada               | 50.26   | -95.87  | 274.96  |
| EBRE | Roquetes               | Spain                | 40.82   | 0.49    | 57.62   |
| FAIR | Fairbanks              | United States        | 64.98   | -147.50 | 307.76  |
| FALE | Faleolo                | Samoa                | -13.83  | -172.00 | 9.73    |

|      |                    |                             |        |         |         |
|------|--------------------|-----------------------------|--------|---------|---------|
| FLIN | CFS FLIN FLON      | Canada                      | 54.73  | -101.98 | 342.32  |
| GODE | Greenbelt          | United States               | 39.02  | -76.83  | 47.77   |
| GOLD | Goldstone          | United States               | 35.43  | -116.89 | 1017.35 |
| GOPE | Ondrejov           | Czech Republic              | 49.91  | 14.79   | 547.60  |
| GRAS | Caussols           | France                      | 43.76  | 6.92    | 1268.25 |
| GRAZ | Graz               | Austria                     | 47.07  | 15.49   | 490.83  |
| GUAM | Dededo             | Guam                        | 13.59  | 144.87  | 146.38  |
| HOB2 | Hobart             | Australia                   | -42.81 | 147.44  | 44.78   |
| HOLB | Holberg            | Canada                      | 50.64  | -128.14 | 575.22  |
| HRAO | Krugersdorp        | South Africa                | -25.89 | 27.69   | 1388.81 |
| IISC | Bangalore          | India                       | 13.02  | 77.57   | 929.62  |
| IRKT | Irkutsk            | Russia                      | 52.22  | 104.32  | 540.79  |
| JOZE | Jozefoslaw         | Poland                      | 52.10  | 21.03   | 109.90  |
| JPLM | Pasadena           | United States               | 34.21  | -118.17 | 457.44  |
| KARR | Karratha           | Australia                   | -20.98 | 117.10  | 116.71  |
| KERG | Port aux Francais  | French Southern Territories | -49.35 | 70.26   | 32.76   |
| KIRU | Kiruna             | Sweden                      | 67.86  | 20.97   | 362.08  |
| KIT3 | Kitab              | Uzbekistan                  | 39.14  | 66.89   | 659.59  |
| KOKB | Kokee Park, Waimea | United States               | 22.13  | -159.67 | 1150.34 |
| KOSG | Kootwijk           | Netherlands                 | 52.18  | 5.81    | 53.36   |
| KOUC | Koumac             | New Caledonia               | -20.56 | 164.29  | 23.71   |
| KOUR | Kourou             | French Guiana               | 5.25   | -52.81  | 8.52    |
| LAMA | Olsztyn            | Poland                      | 53.89  | 20.67   | 157.66  |
| LBCH | Long Beach         | United States               | 33.79  | -118.20 | 8.27    |
| LEEP | Hollywood          | United States               | 34.14  | -118.32 | 519.65  |
| LONG | Irwindale          | United States               | 34.11  | -118.00 | 108.41  |
| LPGS | La Plata           | Argentina                   | -34.91 | -57.93  | 13.93   |
| MAC1 | Macquarie Island   | Australia                   | -54.50 | 158.94  | 12.22   |
| MADR | Robledo            | Spain                       | 40.43  | -4.25   | 776.37  |
| MAS1 | Maspalomas         | Spain                       | 27.76  | -15.63  | 153.62  |
| MATE | Matera             | Italy                       | 40.65  | 16.70   | 490.15  |
| MAW1 | Mawson             | Antarctica                  | -67.61 | 62.87   | 30.48   |
| MCM4 | Ross Island        | Antarctica                  | -77.84 | 166.67  | 150.46  |
| MDO1 | Fort Davis         | United States               | 30.68  | -104.02 | 2026.57 |
| MEDI | Medicina           | Italy                       | 44.52  | 11.65   | 9.91    |
| METS | Kirkkonummi        | Finland                     | 60.22  | 24.40   | 75.76   |
| MKEA | Mauna Kea          | United States               | 19.80  | -155.46 | 3728.39 |
| MONP | Laguna Mountains   | United States               | 32.89  | -116.42 | 1874.71 |
| NANO | Nanoose Bay        | Canada                      | 49.30  | -124.09 | 24.09   |
| NLIB | North Liberty      | United States               | 41.77  | -91.58  | 239.92  |

|      |                           |               |        |         |         |
|------|---------------------------|---------------|--------|---------|---------|
| NRC1 | Ottawa                    | Canada        | 45.45  | -75.62  | 116.02  |
| ONSA | Onsala                    | Sweden        | 57.40  | 11.93   | 8.97    |
| PENC | Penc                      | Hungary       | 47.79  | 19.28   | 248.27  |
| PERT | Perth                     | Australia     | -31.80 | 115.89  | 45.45   |
| PIE1 | Pie Town                  | United States | 34.30  | -108.12 | 2369.48 |
| PIN1 | Pinyon Flat               | United States | 33.61  | -116.46 | 1287.75 |
| POL2 | Bishkek                   | Kyrgyzstan    | 42.68  | 74.69   | 1754.27 |
| POTS | Potsdam                   | Germany       | 52.38  | 13.07   | 103.99  |
| QUIN | Quincy                    | United States | 39.98  | -120.94 | 1129.41 |
| REYK | Reykjavik                 | Iceland       | 64.14  | -21.96  | 26.56   |
| ROCK | Simi Valley               | United States | 34.24  | -118.68 | 588.08  |
| SANT | Santiago                  | Chile         | -33.15 | -70.67  | 695.17  |
| SFER | San Fernando              | Spain         | 36.46  | -6.21   | 39.08   |
| SHAO | Sheshan                   | China         | 31.10  | 121.20  | 11.26   |
| SNI1 | San Nicolas Island        | United States | 33.25  | -119.52 | 276.75  |
| SPK1 | Saddle Peak               | United States | 34.06  | -118.65 | 475.57  |
| STJO | St. John's                | Canada        | 47.60  | -52.68  | 143.10  |
| SVTL | Svetloe                   | Russia        | 60.53  | 29.78   | 60.98   |
| SYOG | East Ongle Island         | Antarctica    | -69.01 | 39.58   | 27.76   |
| TABL | Wrightwood                | United States | 34.38  | -117.68 | 2259.20 |
| TIDB | Tidbinbilla               | Australia     | -35.40 | 148.98  | 646.50  |
| TOW2 | Cape Ferguson             | Australia     | -19.27 | 147.06  | 30.20   |
| TRAK | Irvine                    | United States | 33.62  | -117.80 | 150.29  |
| TSKB | Tsukuba                   | Japan         | 36.11  | 140.09  | 27.35   |
| UCLP | Los Angeles               | United States | 34.07  | -118.44 | 146.83  |
| UCLU | Ucluelet                  | Canada        | 48.93  | -125.54 | 28.74   |
| USC1 | Los Angeles               | United States | 34.02  | -118.29 | 57.41   |
| USUD | Usuda                     | Japan         | 36.13  | 138.36  | 1465.31 |
| VILL | Villafranca               | Spain         | 40.44  | -3.95   | 595.40  |
| VNDP | Vandenberg Air Force Base | United States | 34.56  | -120.62 | 24.62   |
| WES2 | Westford                  | United States | 42.61  | -71.49  | 113.65  |
| WHC1 | Whittier                  | United States | 33.98  | -118.03 | 129.37  |
| WHIT | Whitehorse                | Canada        | 60.75  | -135.22 | 1419.57 |
| WILL | Williams Lake             | Canada        | 52.24  | -122.17 | 1110.42 |
| WLSN | Mt. Wilson                | United States | 34.23  | -118.06 | 1738.07 |
| WSLR | Whistler                  | Canada        | 50.13  | -122.92 | 924.11  |
| WTZR | Bad Koetzing              | Germany       | 49.14  | 12.88   | 619.21  |
| WUHN | Wuhan                     | China         | 30.53  | 114.36  | 39.76   |
| YELL | Yellowknife               | Canada        | 62.48  | -114.48 | 207.61  |
| ZIMM | Zimmerwald                | Switzerland   | 46.88  | 7.47    | 906.72  |

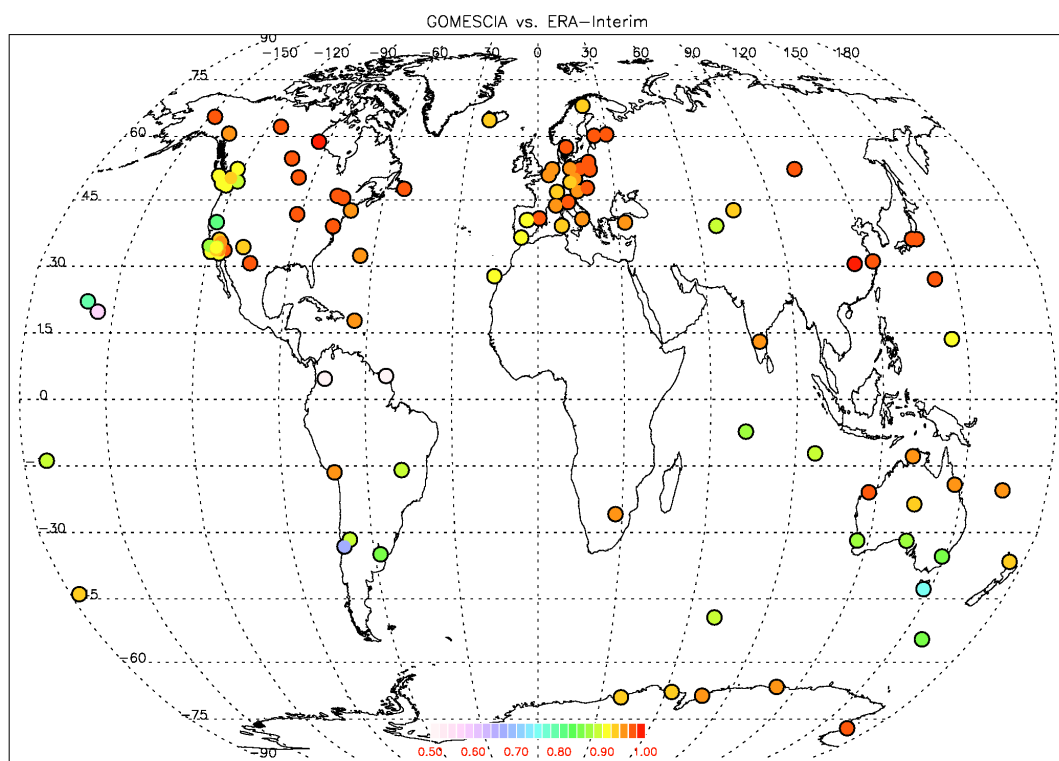

**Figure S1.** Correlation coefficients between the I WV monthly means of GOMESCIA and ERA-Interim.

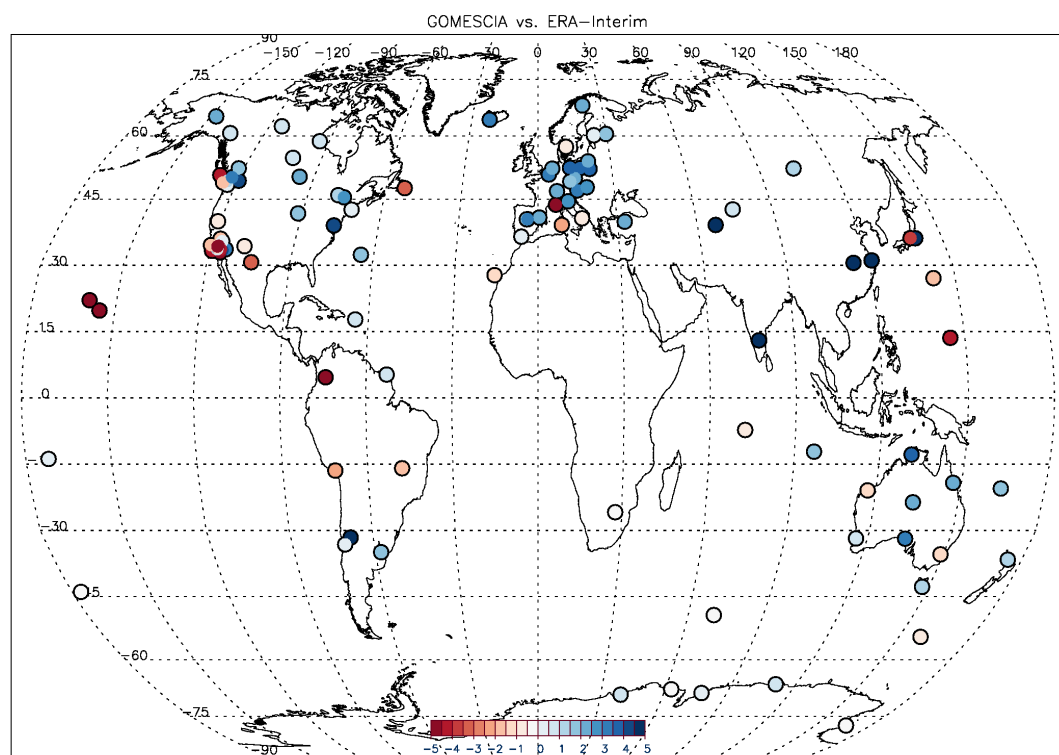

**Figure S2.** Mean differences between the I WV monthly means of GOMESCIA and GPS (GOMESCIA I WV minus ERA-Interim I WV).

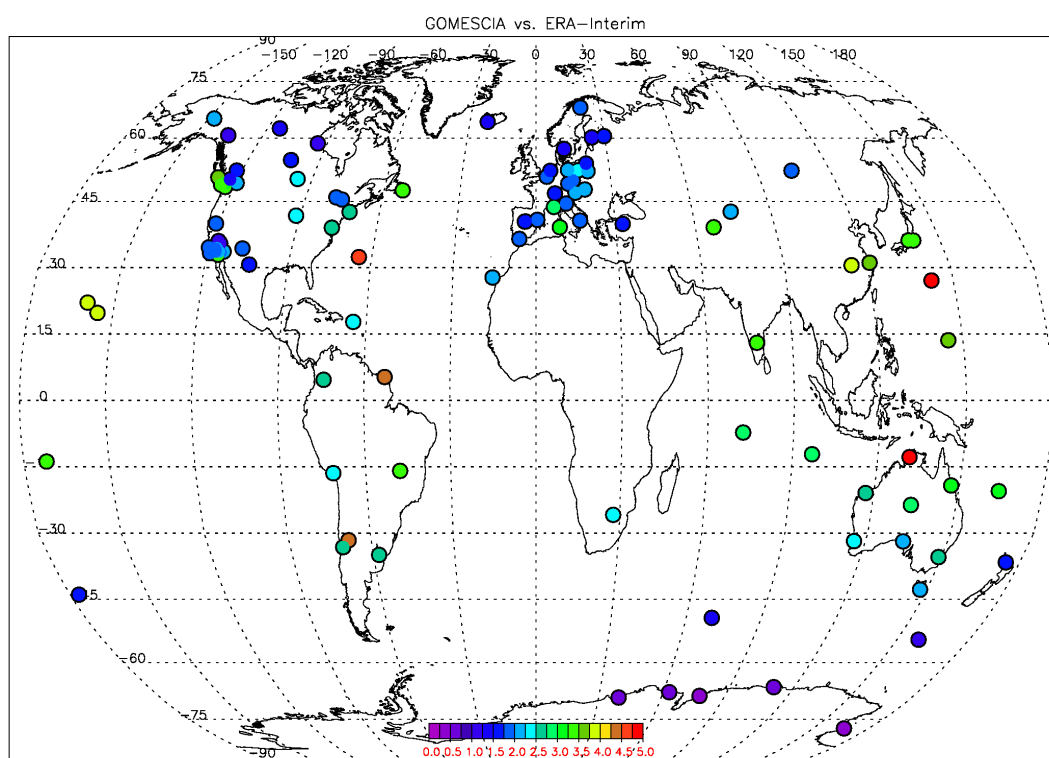

Figure S3. Standard deviations of the differences between the IWV monthly means of GOMESCIA and ERA-Interim.

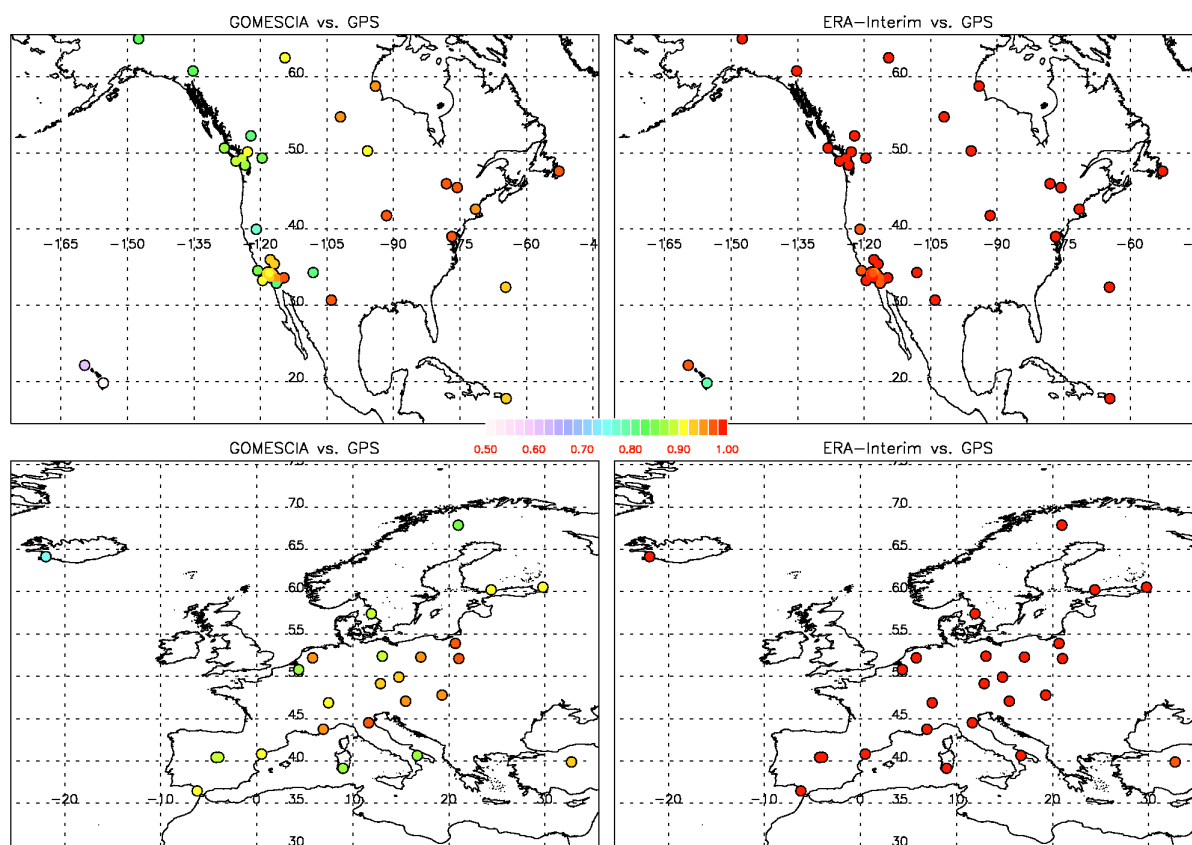

Figure S4. Similar as for Figure 2: correlation coefficients between the IWV monthly means of GOMESCIA and GPS (left) and ERA-Interim and GPS (right), but now zoomed in on North America (upper panels) and Europe (lower panels).

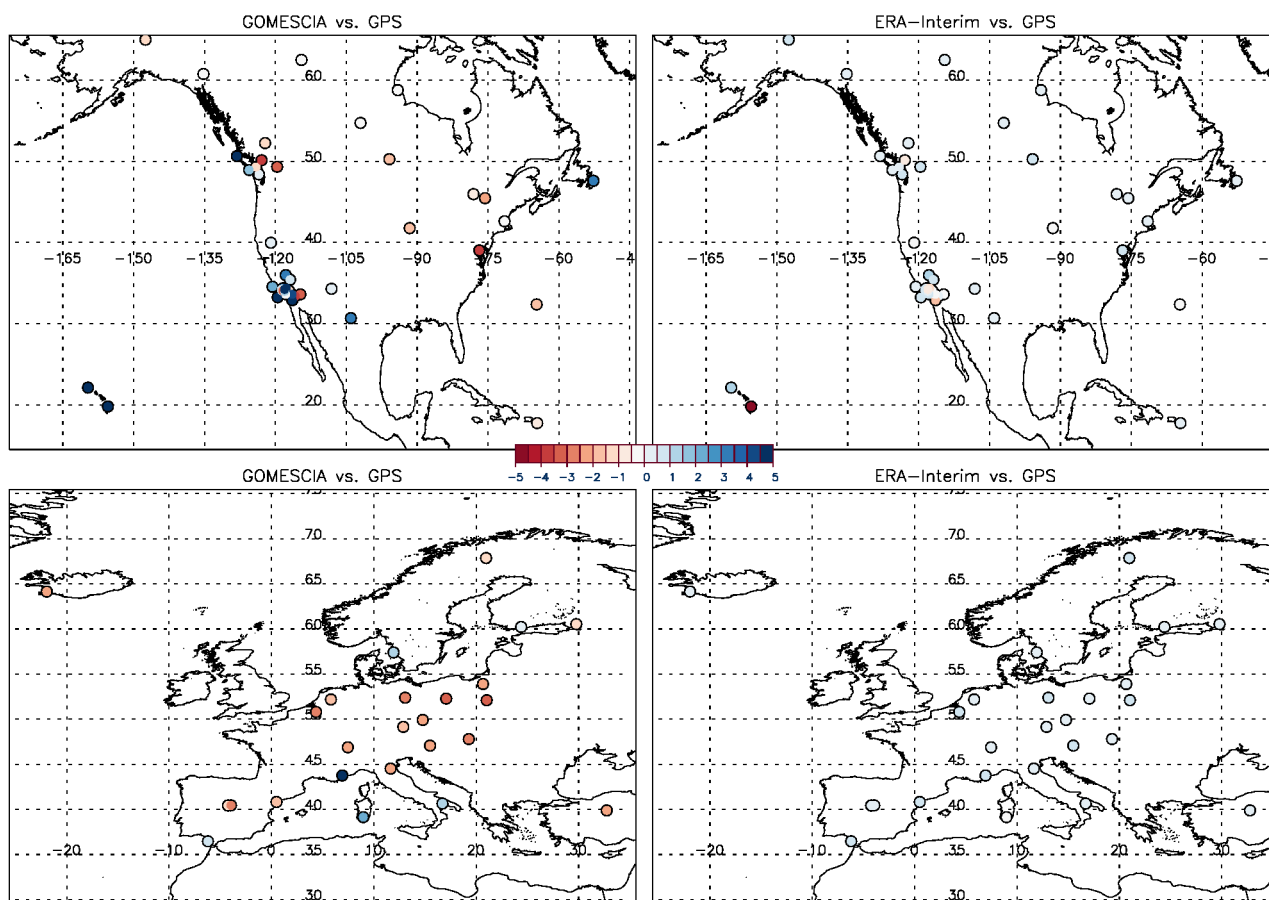

**Figure S5.** Similar as for Figure.3: mean differences between the IWV monthly means of GOMESCIA and GPS (GOMESCIA IWV minus GPS IWV) (left) and ERA-Interim and GPS (ERA-Interim IWV minus GPS IWV) (right), but now zoomed in on North America (upper panels) and Europe (lower panels).

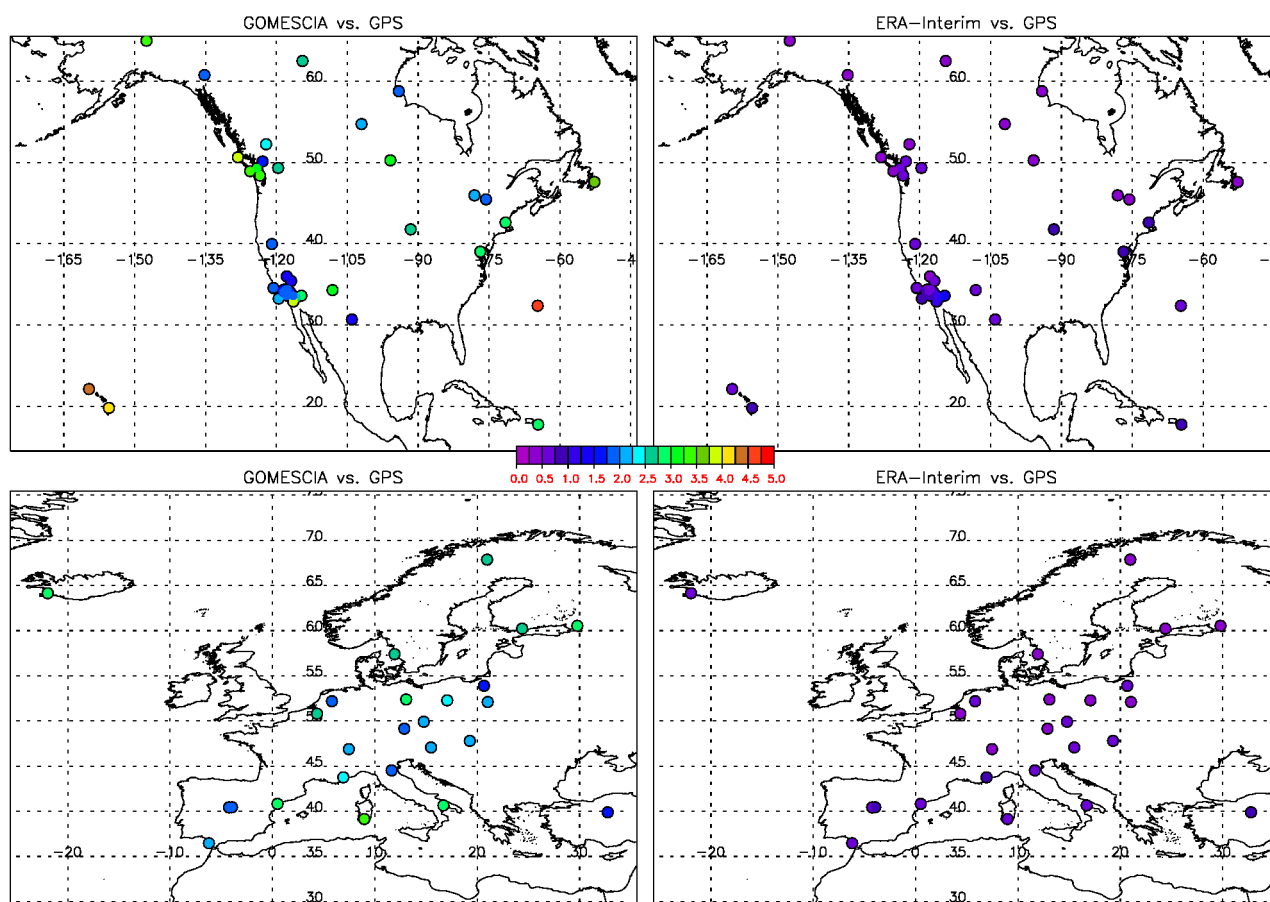

**Figure S6.** Similar as for Figure 4: standard deviations of the differences between the IWV monthly means of GOMESCIA and GPS (left) and ERA-Interim and GPS (right), but now zoomed in on North America (upper panels) and Europe (lower panels).

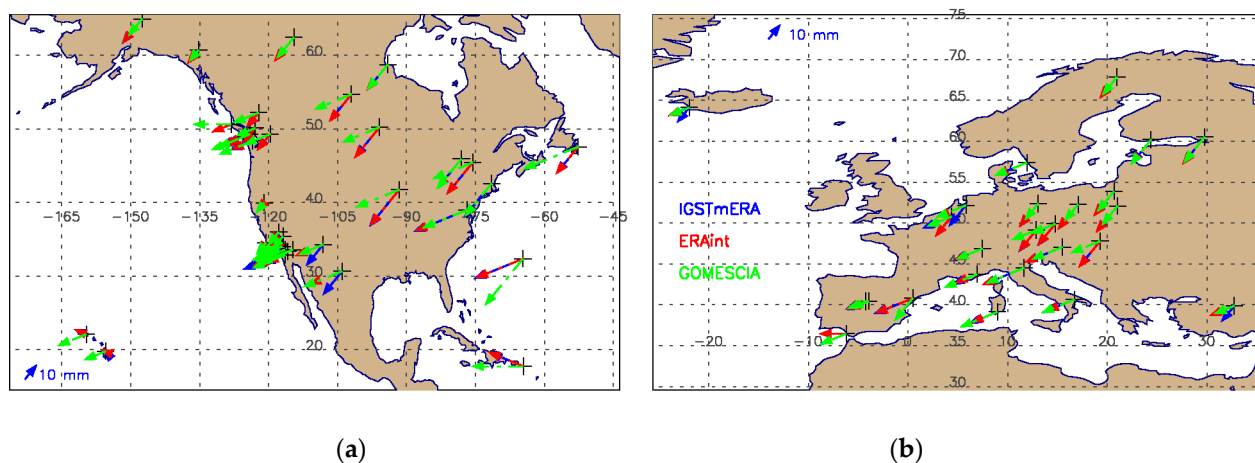

**Figure S7.** Same as for Figure 5, but now zoomed in on (a) North America and (b) Europe.

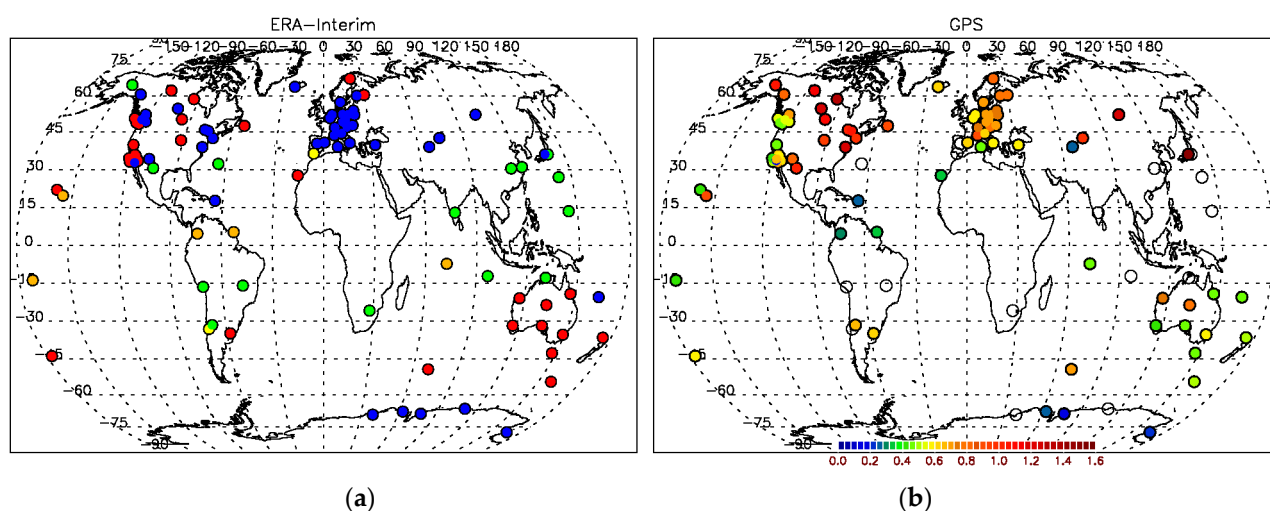

**Figure S8.** Similar as for Figure 8, but now: (a) Classification of the ERA-Interim IWRV time series according to their frequency distributions: Gaussian (yellow), standard lognormal (red), reverse lognormal (orange), shouldered lognormal (blue), and bimodal (green). (b) Distribution of the geometric standard deviation (GSD) of a single lognormal distribution fitted through the GPS IWRV histograms. The sites with unfilled circles have bimodal distributions.

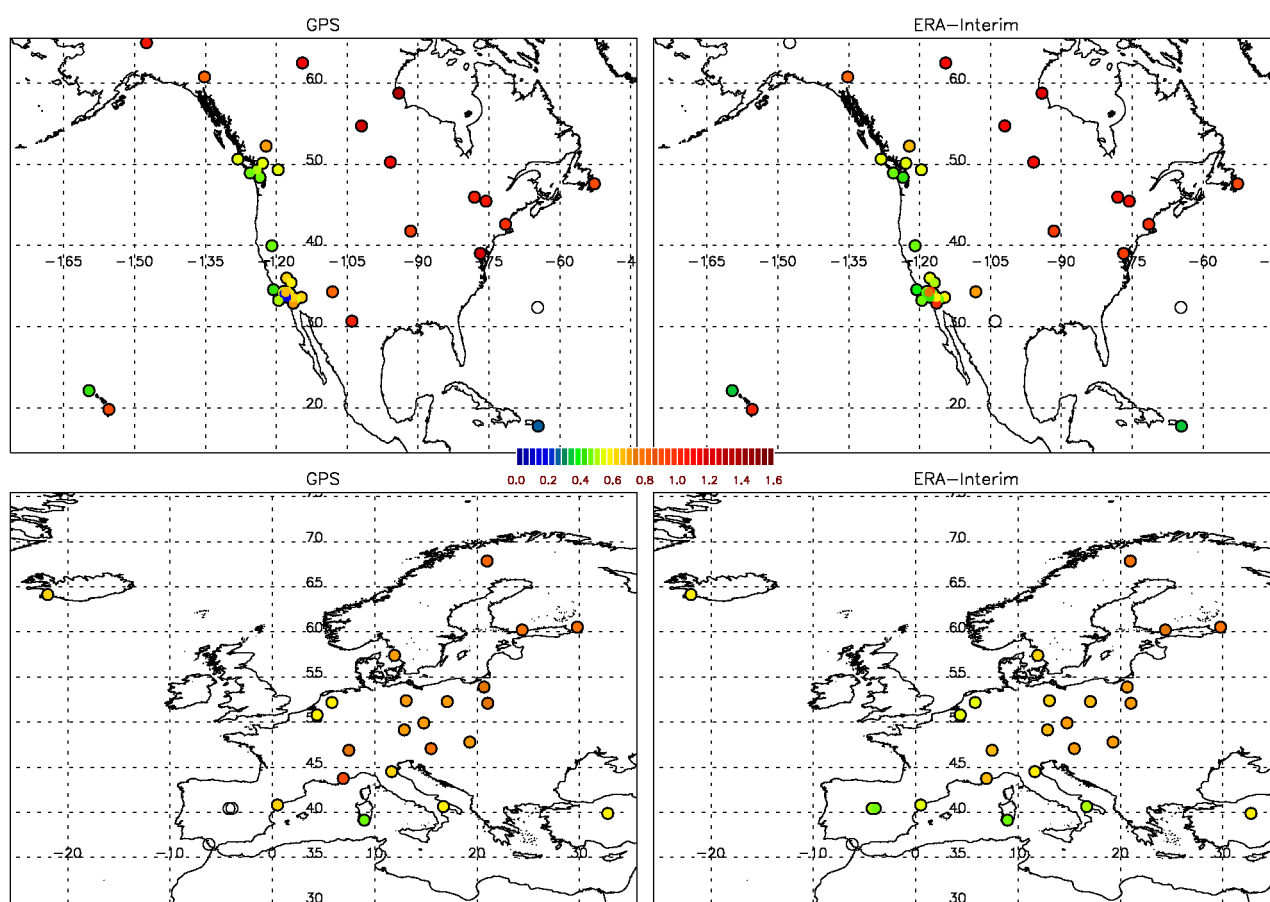

**Figure S9.** Zoom-in on North America (upper plots) and Europe (lower plots) for the GSD distributions of a single lognormal distribution fitted through the GPS (left) and ERA-Interim (right) IWRV histograms, as in Figures 8b and S5b.



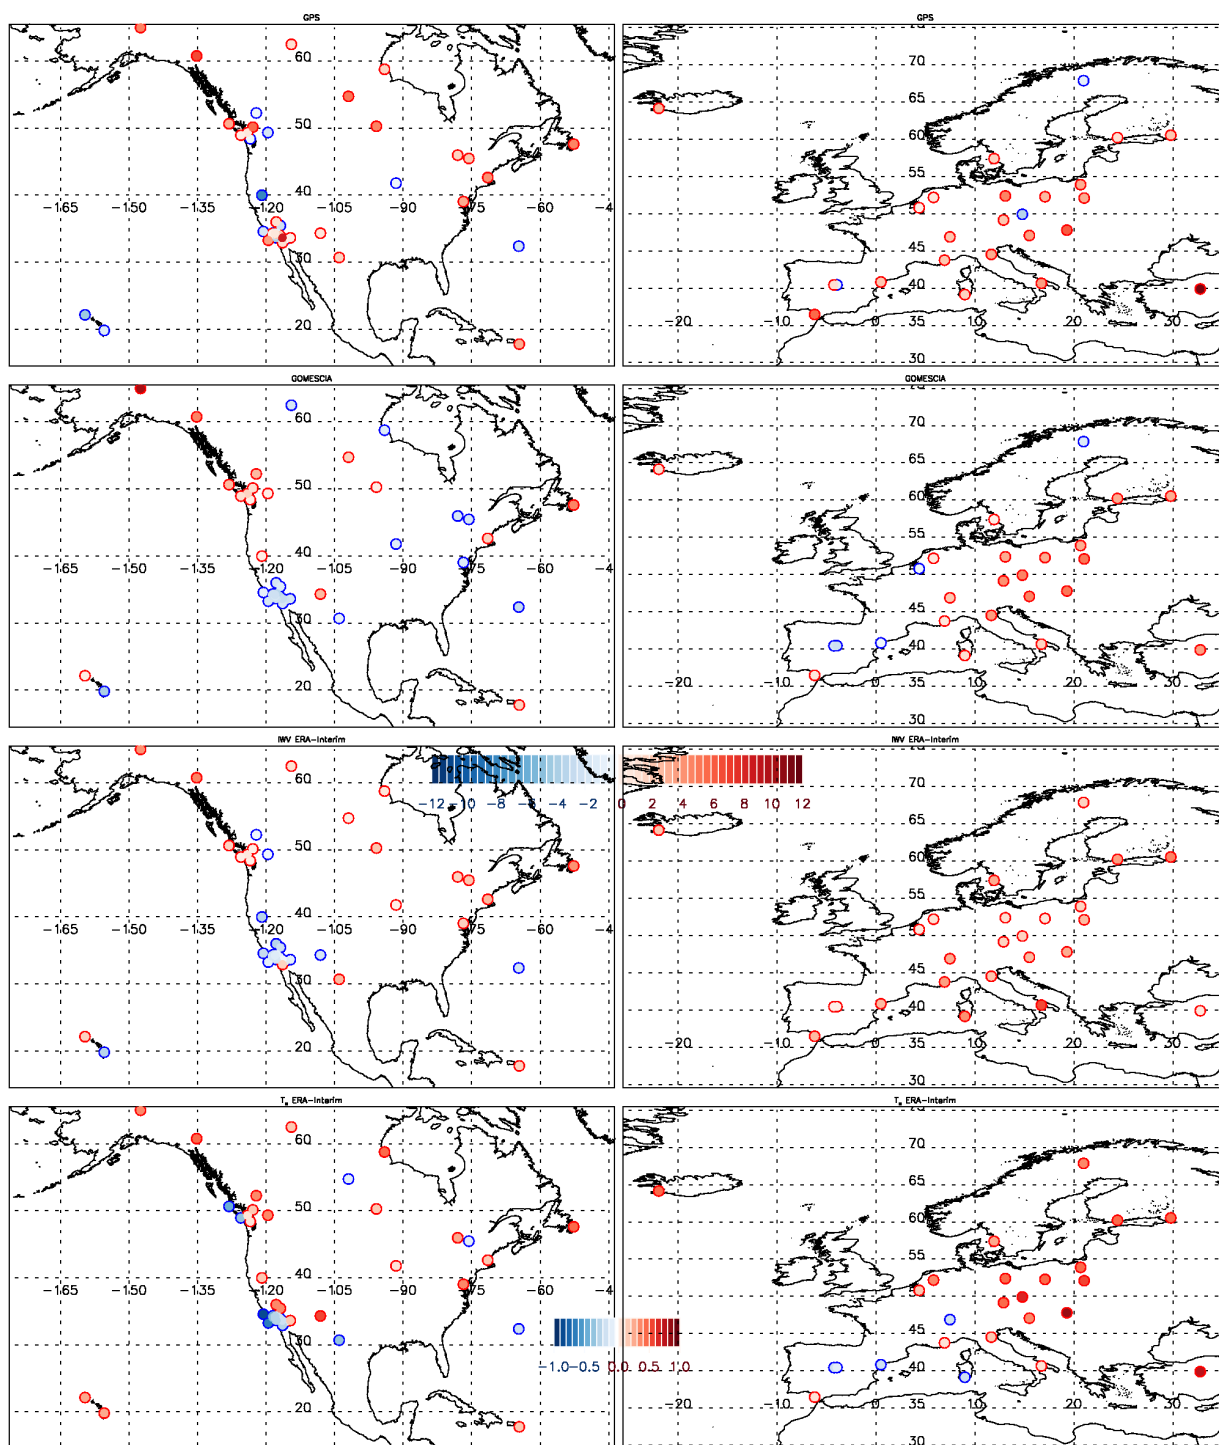

**Figure S10.** IWV trends [ $\% \text{ dec}^{-1}$ ] for GPS, GOMESCIA, and ERA-Interim (resp. from upper to lower plots) for the period Jan 1996 – Dec 2010 over North America (left) and Europe (right). For illustration, the lower panels show the ERA-Interim surface temperature trends for the same period in  $^{\circ}\text{C dec}^{-1}$  for the same regions.
